# Supplementary material
Source: PubMed Central journal article supplement (PMC2781609)
Supplement: supp_M109.040964_jbc.M109.040964-1.pdf [file supp_M109.040964_jbc.M109.040964-1.pdf]

## SUPPLEMENTAL DATA

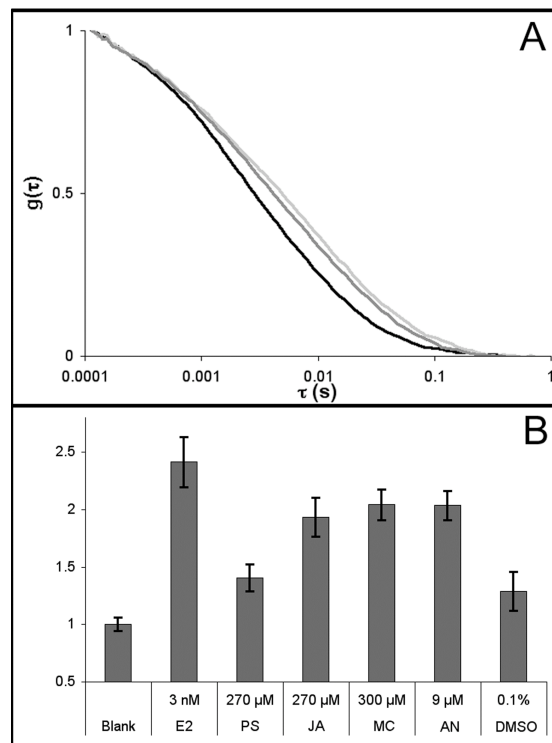

**SUPPLEMENTAL FIGURE 1.** Nuclear mobility changes of ER-YFP upon addition of estrogenic odorants. (A) Normalized correlation curves  $g(t)$  as function of Javanol concentration: untreated cells (black), cells treated with 27 mM Javanol (dark grey) and 270 mM Javanol (light grey). Slower diffusion results in a decay of the curve at longer times. (B) Average diffusion time of ER-YFP in the nuclei of living cells treated with ER specific ligands and odorants; representative raw data are shown in A. For each condition 11 to 25 individual cells were analyzed. Diffusion times are normalized relative to the untreated cells to account for day-to-day variations in optical settings and cell culture. Bars represent standard error. The diffusion constant of ER-YFP in untreated cells is  $D = 3.2 \pm 0.5 \text{ cm}^2 \text{ s}^{-2}$ .
